# Supplementary material
Source: PubMed Central journal article supplement (PMC8816864)

**Supplementary Figures.** A.-F.- Additional AU-FDS analyses of Flag-eRF1 pull-downs in the presence of GFP-tagged chaperones. A.- Same as Figure 2E, except with reduced scale; B.- same as Figure 2F, except with reduced scale; C. and D.- same, except with different scales; E. and F.- same, except with different scales.

Supplementary Figures

A

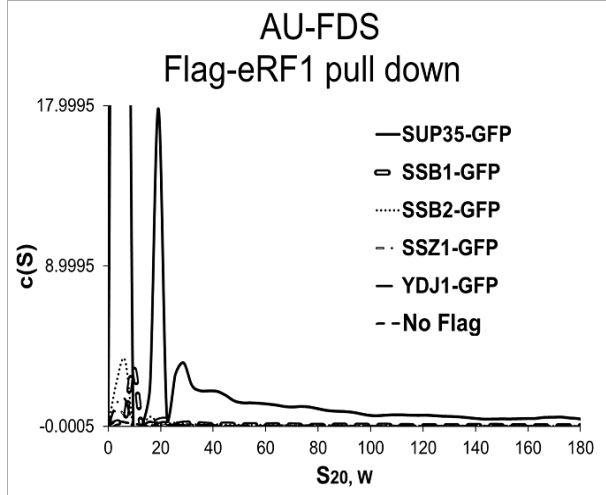

B

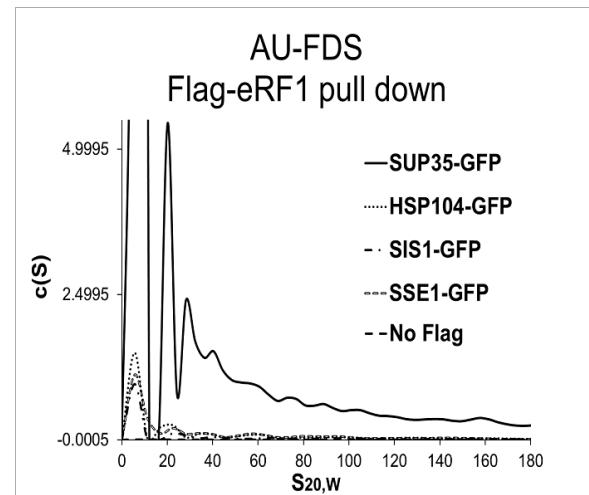

C

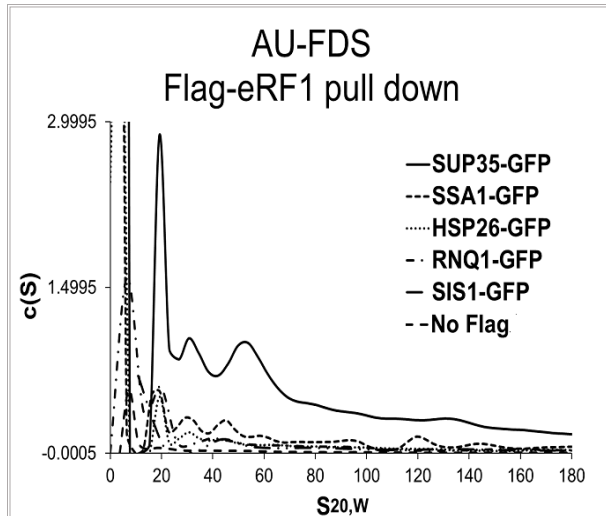

D

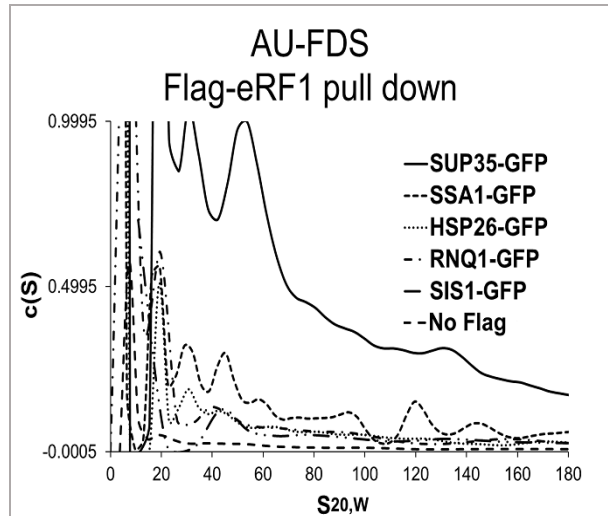

E

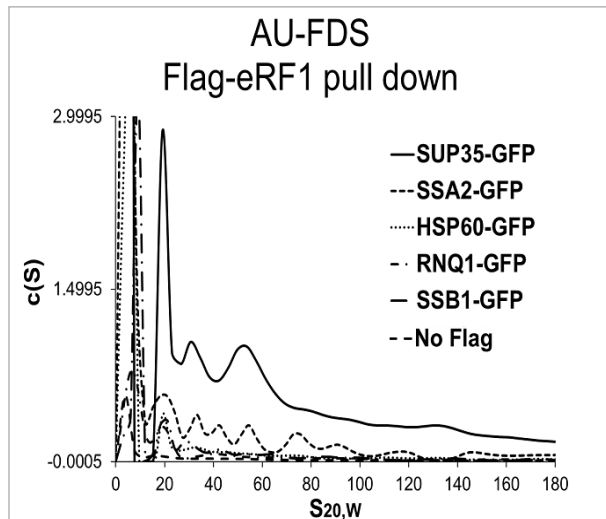

F

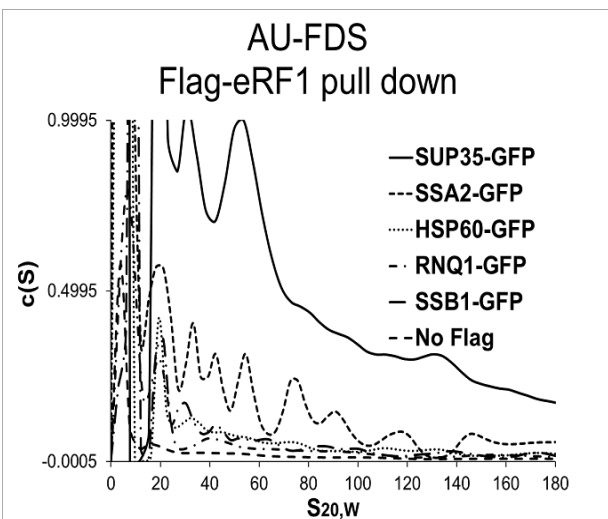

Supplement: NIHMS1757848-supplement-supinfo.pdf [file NIHMS1757848-supplement-supinfo.pdf]
